# Supplementary material for: Changes in the Porcine Intestinal Microbiome in Response to Infection with Salmonella enterica and Lawsonia intracellularis
Source: PubMed Central journal article supplement (PMC4604083; doi:10.1371/journal.pone.0139106), 2015-10-13

### Control

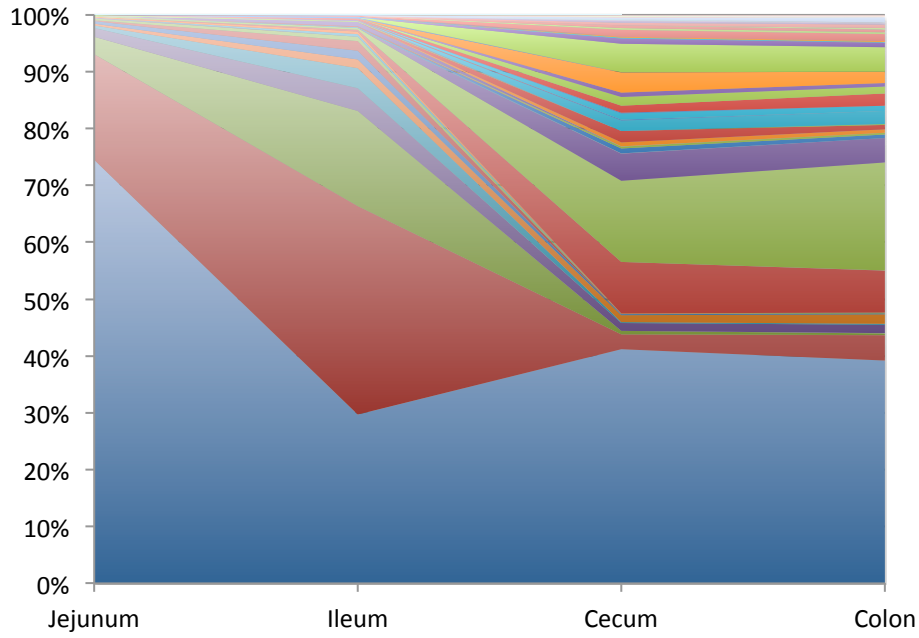

### 5 Weeks



### 7 Weeks

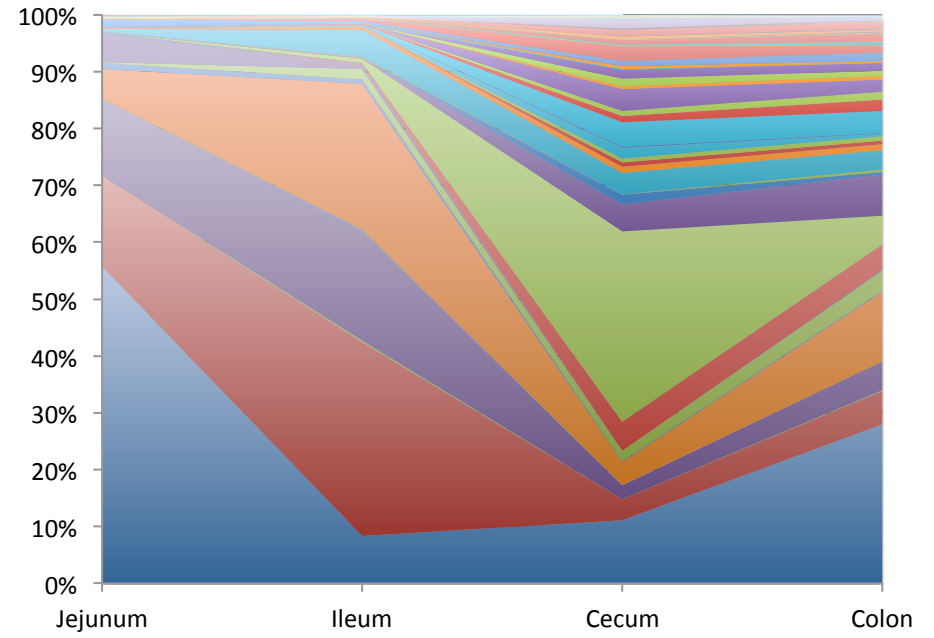

### 9 Weeks

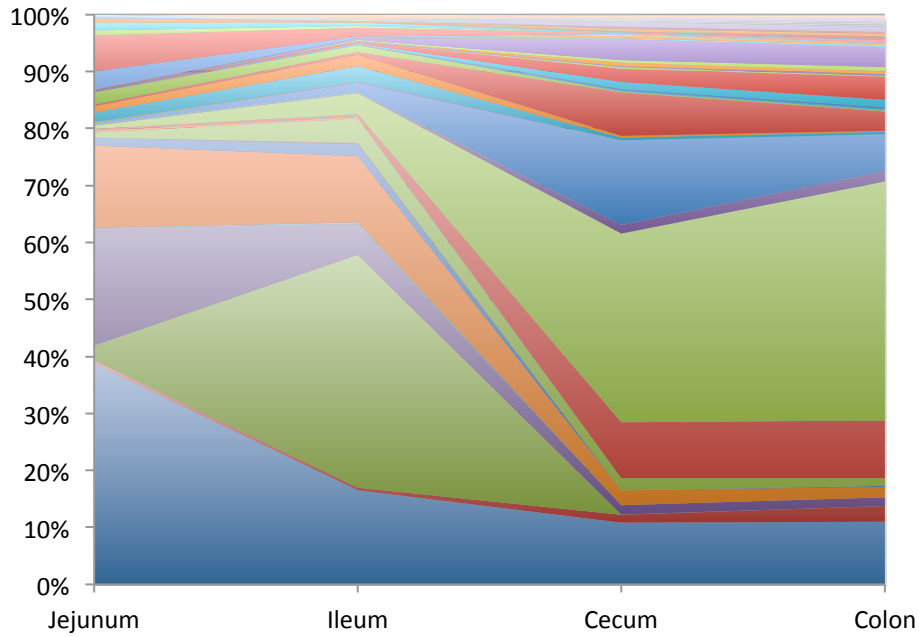

### 11 Weeks

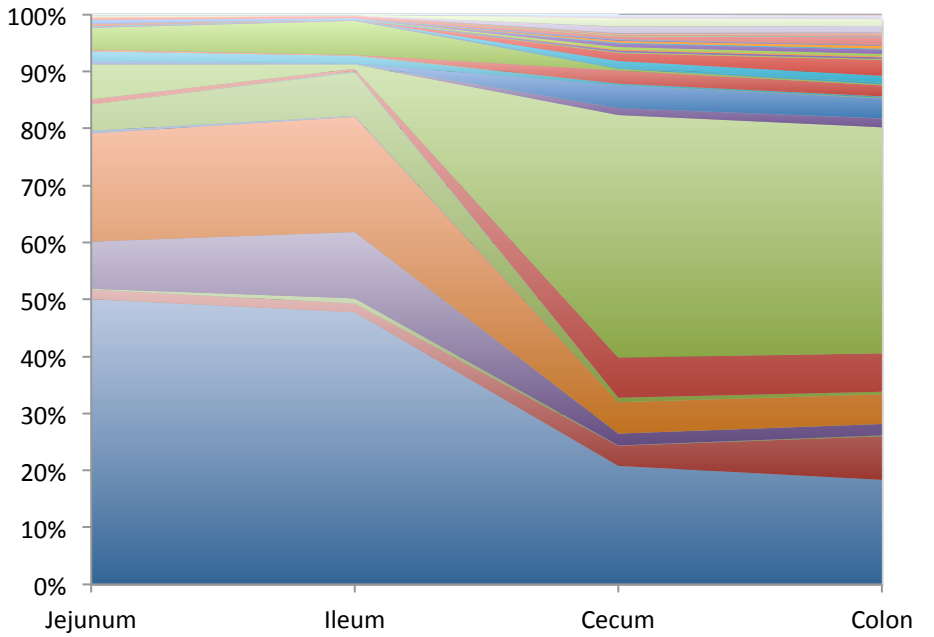

Supplement: pone.0139106.s001.pdf [file pone.0139106.s001.pdf]
