# Supplementary material for: Changes in the Porcine Intestinal Microbiome in Response to Infection with Salmonella enterica and Lawsonia intracellularis
Source: PubMed Central journal article supplement (PMC4604083; doi:10.1371/journal.pone.0139106), 2015-10-13

# Lawsonia

## 5 Weeks

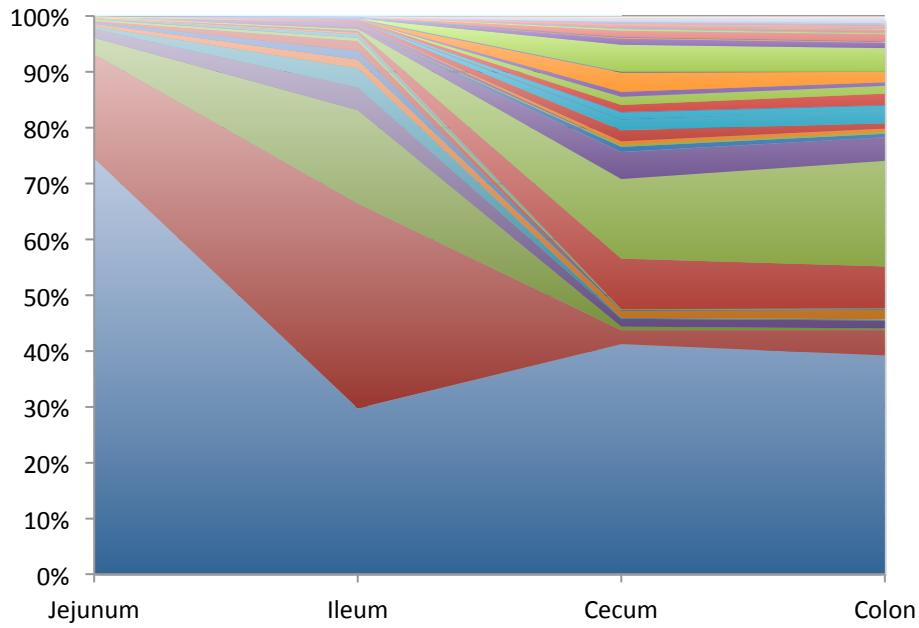

## 7 Weeks

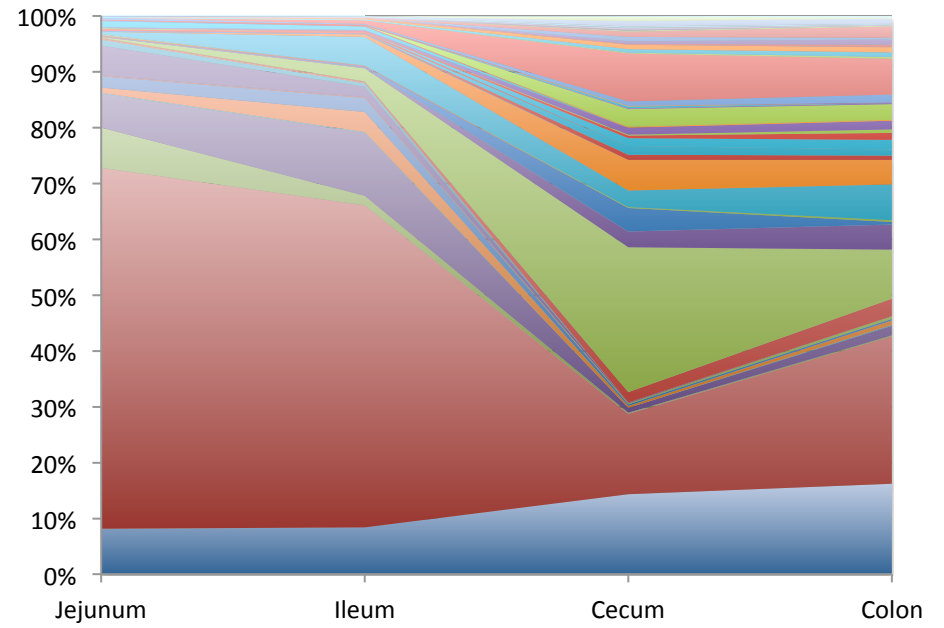

## 9 Weeks

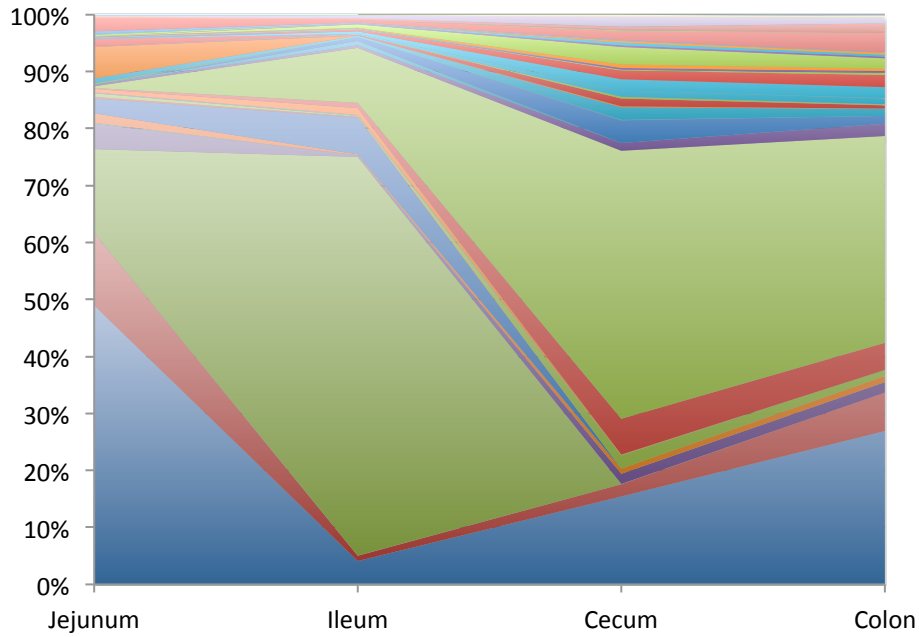

## 11 Weeks

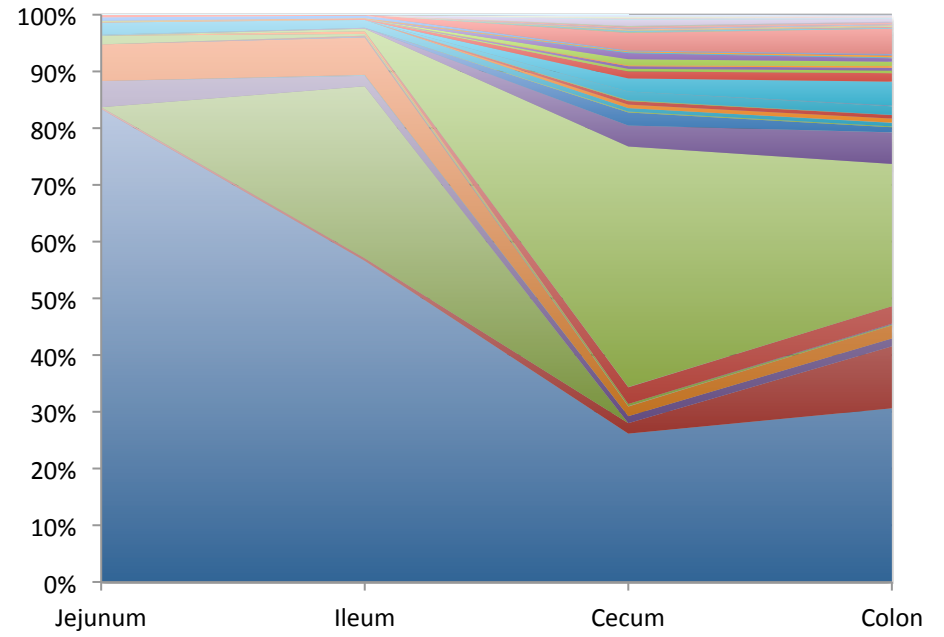

Supplement: pone.0139106.s003.pdf [file pone.0139106.s003.pdf]
