# Supplementary material for: Changes in the Porcine Intestinal Microbiome in Response to Infection with Salmonella enterica and Lawsonia intracellularis
Source: PubMed Central journal article supplement (PMC4604083; doi:10.1371/journal.pone.0139106), 2015-10-13

Salmonella and Lawsonia  
5 Weeks

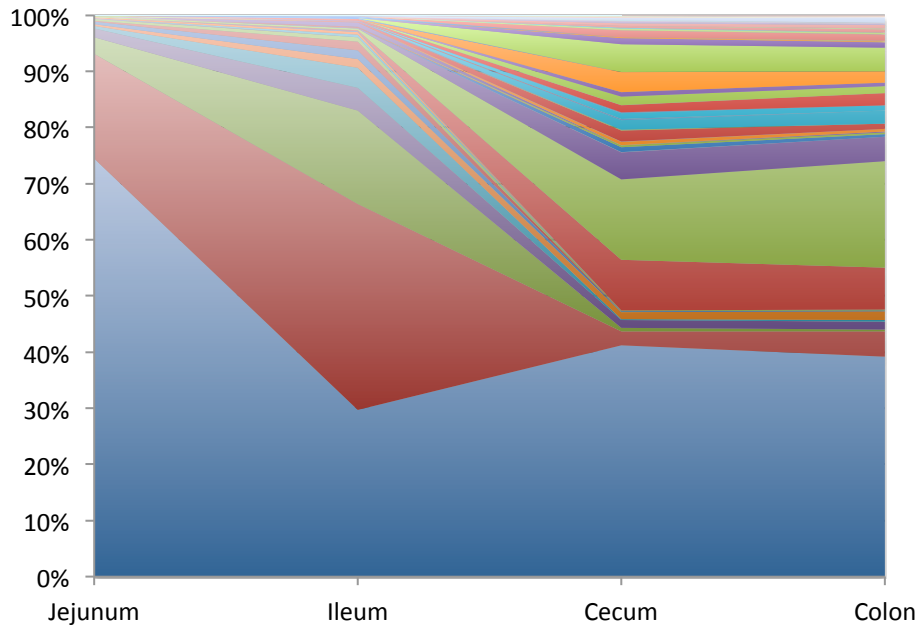

7 Weeks

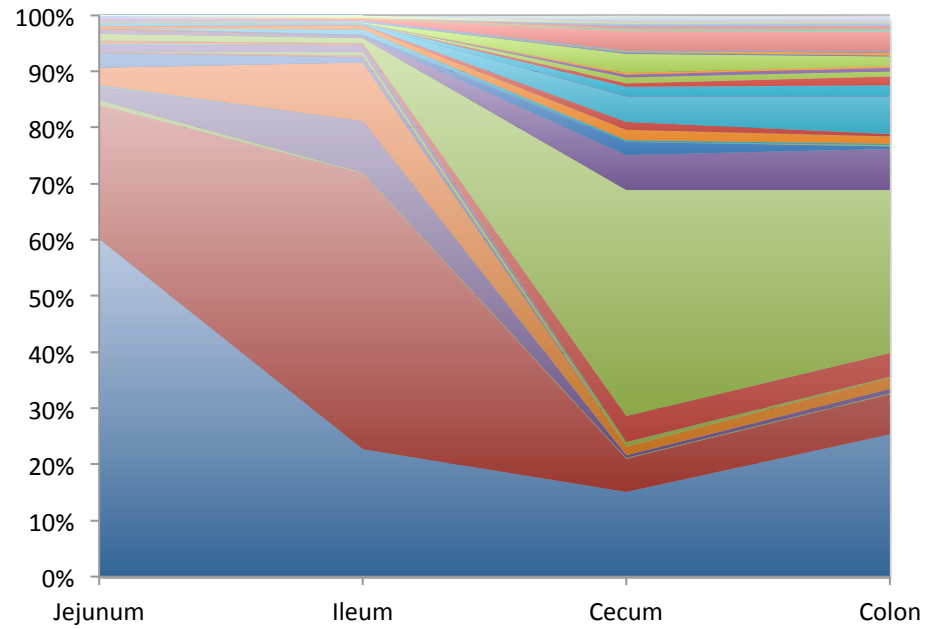

9 Weeks

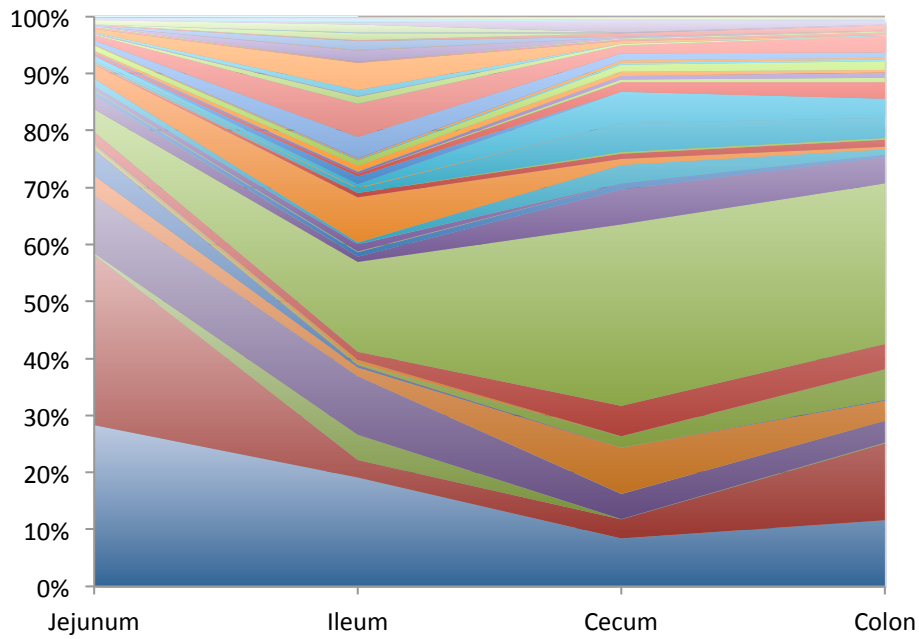

11 Weeks

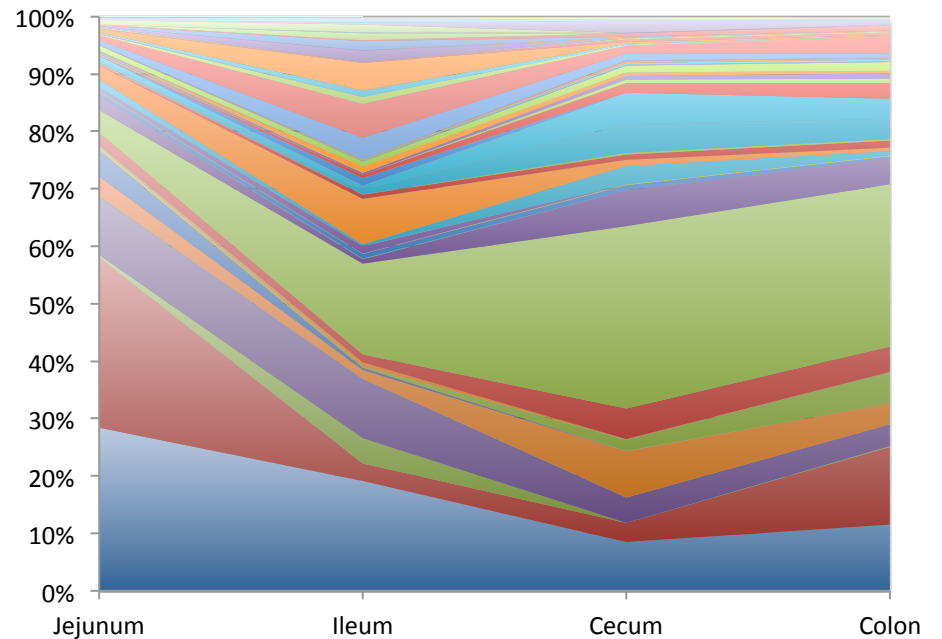

Supplement: pone.0139106.s004.pdf [file pone.0139106.s004.pdf]
